# Supplementary material
Source: publisher figshare collection journal article supplement (https://sage.figshare.com/ndownloader/files/21110046)
Supplement: Supplementary file 1 [file 21110046]

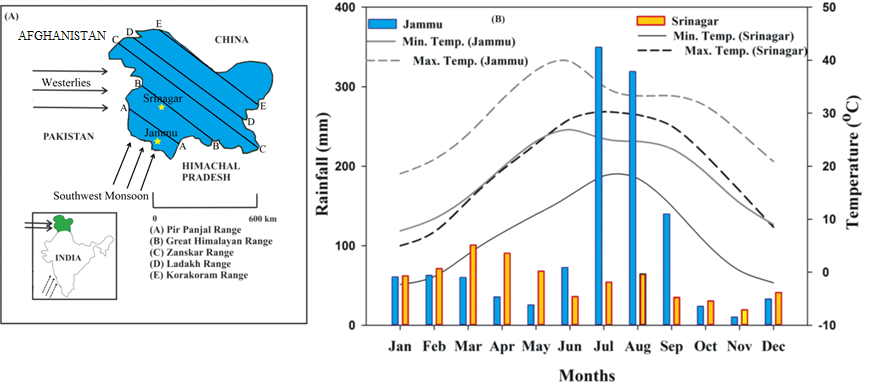


Supplementary figure 1: (A) Schematic diagram showing influence of SWM in Jammu region, and westerlies in the Kashmir valley and the two neighboring regions separated by the Pir Panjal mountain range (B) showing variation in precipitation pattern and temperature in Jammu region and Srinagar district of the Kashmir valley (Data source: http://worldweather.wmo.int/en/city.html?cityId=536).
